# Supplementary material for: Towards high-volumetric performance of Na/Li-ion batteries: a better anode material with molybdenum pentachloride–graphite intercalation compounds (MoCl5–GICs)
Source: Royal Society of Chemistry journal article supplement (doi:10.1039/c9ta12651a), 2020-01-01
Supplement: c9ta12651a1.pdf [file c9ta12651a1.pdf]

## Electronic Supplementary Information

### **Towards high-volumetric performance of Na/Li-ion batteries: A better anode material with molybdenum pentachloride–graphite intercalation compounds (MoCl<sub>5</sub>-GICs)**

*Zheng Li,<sup>a,b</sup> Chengzhi Zhang,<sup>a,b</sup> Fei Han,<sup>\*a,b</sup> Fei Wang,<sup>a,b</sup> Fuquan Zhang,<sup>a,b</sup> Wei Shen,<sup>c</sup> Chong Ye,<sup>a,b</sup> Xuanke Li,<sup>a,b</sup> and Jinshui Liu<sup>\*a,b</sup>*

<sup>a</sup> College of Materials Science and Engineering, Hunan University, Changsha 410082, China

<sup>b</sup> Hunan Province Key Laboratory for Advanced Carbon Materials and Applied Technology, Hunan University, Changsha, Hunan, 410082, China

<sup>c</sup> School of Environmental and Chemical Engineering, Jiangsu University of Science and Technology, Zhenjiang 212003, China.

Hunan University, Changsha, 410082, China

E-mail: feihan@hnu.edu.cn, Jsliu@hnu.edu.cn

## Experimental section

*Synthesis of MoCl<sub>5</sub>-intercalated GICs:* The MoCl<sub>5</sub>-intercalated GICs were directly prepared by a molten-salt method. In a typical procedure, the raw materials of natural flake graphite (325 mesh, 99.95%, purchased from Laixi Graphite Trading Corp.), MoCl<sub>5</sub> and MoO<sub>3</sub> (purchased from Alfa Aesar) were firstly dried in a vacuum oven at 80 °C to remove the surface-adsorbed water. Then, 2.0 g of natural graphite flakes were quickly mixed with 10 g of MoCl<sub>5</sub> and 5g of MoO<sub>3</sub> salts in a mortar, and the mixture was placed into a sealed stainless-steel autoclave (Anhui Kemi Machinery Technology Co., Ltd). Subsequently, the autoclave was continuously heated at 350 °C for 24 h with a heating rate of 5 °C min<sup>-1</sup>. After cooling, the powder was washed in turn with ethanol, 0.1M of HCl solution and deionized water to remove the residual reactants. After drying at 80 °C, the MoCl<sub>5</sub>-intercalated GICs with stage 1 structure were obtained. The stage 2 MoCl<sub>5</sub>-GICs were synthesized in the same procedure, except the mass of MoCl<sub>5</sub> was changed to 8 g and without the addition of MoO<sub>3</sub> salt.

*Materials Characterizations:* The crystal phase structure was monitored by X-ray powder diffraction on a TD-3300 diffractometer with Cu K $\alpha$  radiation ( $\lambda = 1.5406 \text{ \AA}$ ) at a scanning step of 0.02°. Raman spectrometry was operated by a Labram-010 system with an excitation laser of 514 nm in a spectral resolution of 1 cm<sup>-1</sup>. The powder electronic conductivity was tested by a four-point probe method in an ST-2722 semiconductor resistivity powder tester. Scanning electron microscopy (SEM) and transmission electron microscopy (TEM) were carried out on Sigma HD and FEI-Tecnai/Titan G2 60-300 microscopes, respectively. X-ray photoelectron spectroscopy (XPS) was conducted on an ESCALAB 250XI spectrometer with a monochromatic Al K $\alpha$  source. The data were calibrated with the C 1s binding energy of 284.6 eV.

*Electrochemical Measurements:* The electrochemical performance was tested by assembling CR2016/CR2025-type coin cells in an argon protected glovebox. The working electrodes were composed of 80 wt% active material, 10 wt% conducting agent of super P, and 10 wt% carboxymethyl cellulose binder on a Cu foil current collector. The typical mass loading of each disk was about 1.5 mg cm<sup>-2</sup>. The lithium plate and sodium plate were used as the counter/reference electrodes for LIBs and SIBs, respectively. The electrolyte was a 1.0 M of LiPF<sub>6</sub> salt in ethylene carbonate (EC)/diethyl carbonate (DEC) (1:1 by volume) for LIBs, and 1.0 M of NaPF<sub>6</sub> in diglyme solution for SIBs without any additive. The galvanostatic discharge/charge tests were carried out on a Land CT2001A battery tester in a voltage range of 0.005–3 V. The cyclic voltammogram curves were recorded on a CHI660E electrochemical workstation in a potential window of 0.005–3.0 V. A Gamry interface 1000E electrochemical workstation was used to test the electrochemical impedance spectroscopy (EIS) from 100 kHz to 10 MHz frequency.

*Computational methods:* All calculations of binding energy and activation energy were performed using density functional theory (DFT) in the CASTEP program with the projector-augmented wave (PAW) method. The generalized gradient approximation (GGA) with Perdew-BurkeErnzerhof (PBE) functionals were used to describe exchange-correlation interaction of electrons with a cutoff energy of 520 eV. The threshold of convergence was set to be 1×10<sup>-5</sup> eV and k-points sampling are generated automatically with 0.05 Å<sup>-1</sup> for structure relaxation. For instance, to model appropriate supercells for the MoCl<sub>5</sub>/graphite layer structures, a supercell consisted of a 2×1×2 layer of MoCl<sub>5</sub> (010) and a 5×5×1 layer of graphite with lattice constants a = b = 12.99995 Å and c = 26.792214 Å was built. Similarly, a supercell consisted of a 4×4×1 layer of Mo (001) and a 3×3×1 layer of NaCl (100) with lattice constants a = b

= 11.92182 Å and  $c = 24.87631$  Å was constructed. For all of the monolayer structural models, a vacuum layer of 15 Å was employed to avoid the interactions between the adjacent cells. The geometric structures were totally relaxed with a force convergence criterion of 0.01 eV Å<sup>-1</sup>.

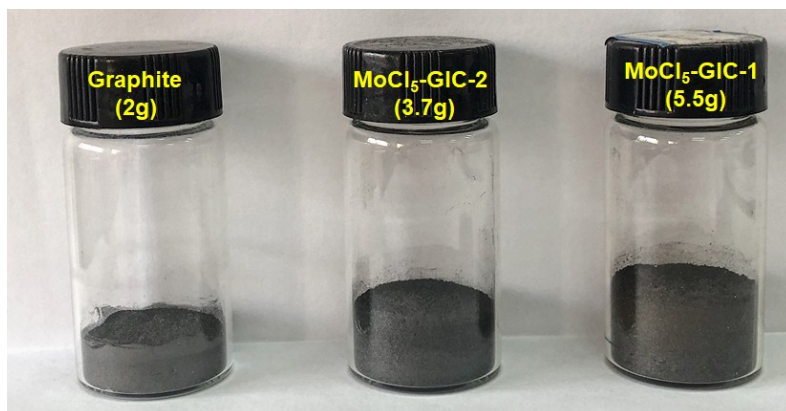

**Fig. S1** The optical photo of pristine graphite and MoCl<sub>5</sub>-intercalated GIC samples.

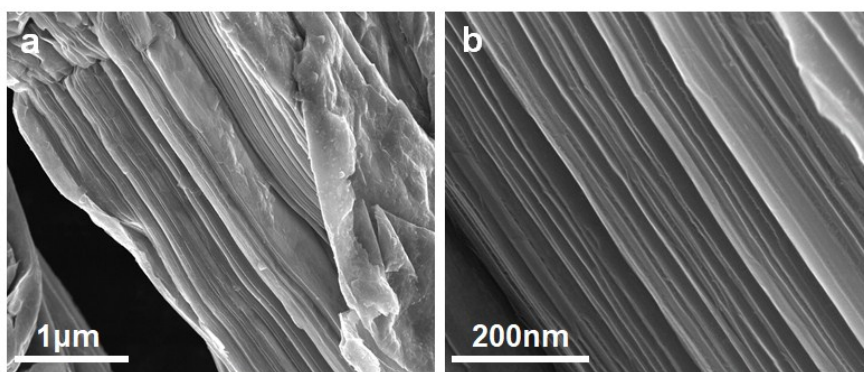

**Fig. S2** SEM images of FeCl<sub>3</sub>-GIC with stage 1 structure.

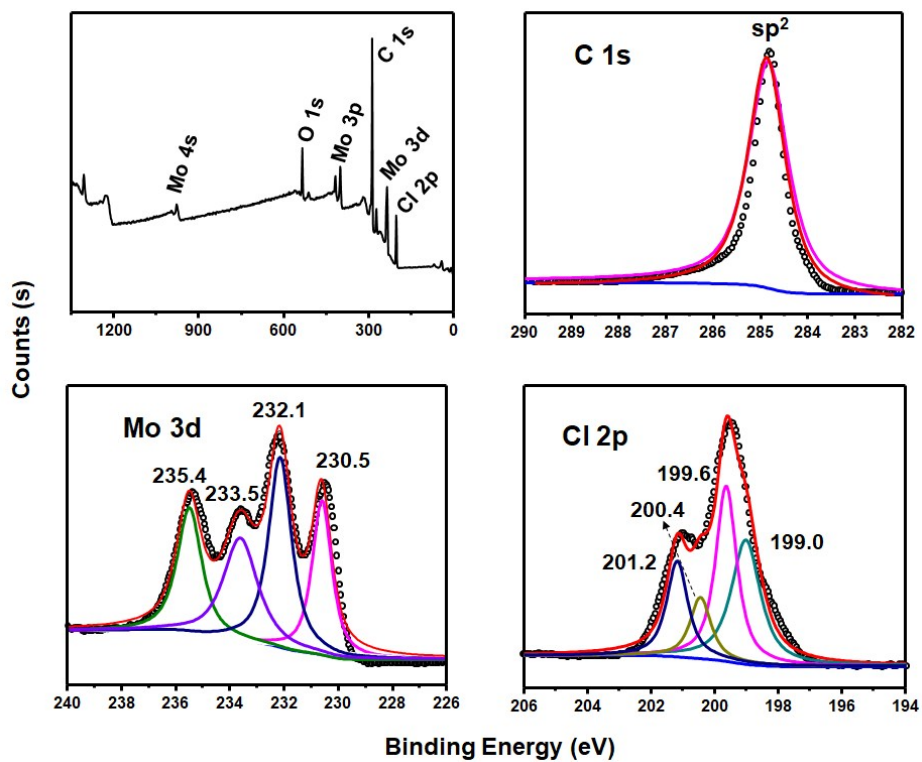

**Fig. S3** XPS profiles of (a) MoCl<sub>5</sub>-GIC-1, and its high-resolution spectra of (b) C 1s, (c) Mo 3d and (d) Cl 2p.

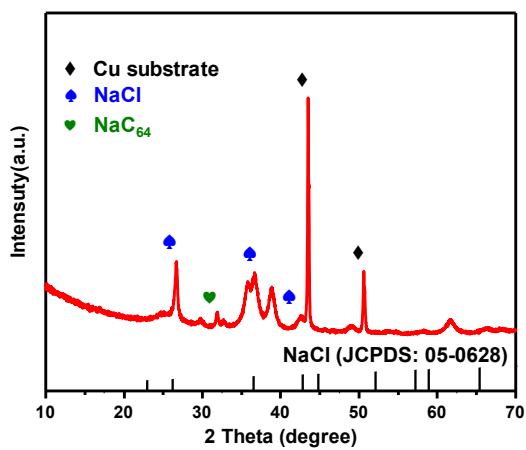

**Fig. S4** XRD pattern of the MoCl<sub>5</sub>-GIC-1 electrode at discharge to 0.96 V (vs. Na/Na<sup>+</sup>).

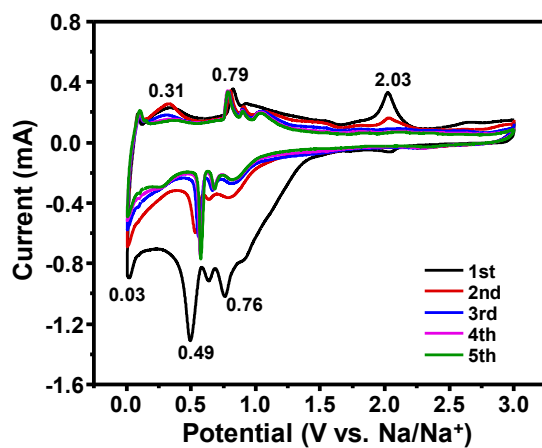

**Fig. S5** Cyclic voltammograms of the MoCl<sub>5</sub>-GIC-2 anode at 0.2 mV s<sup>-1</sup> for SIBs.

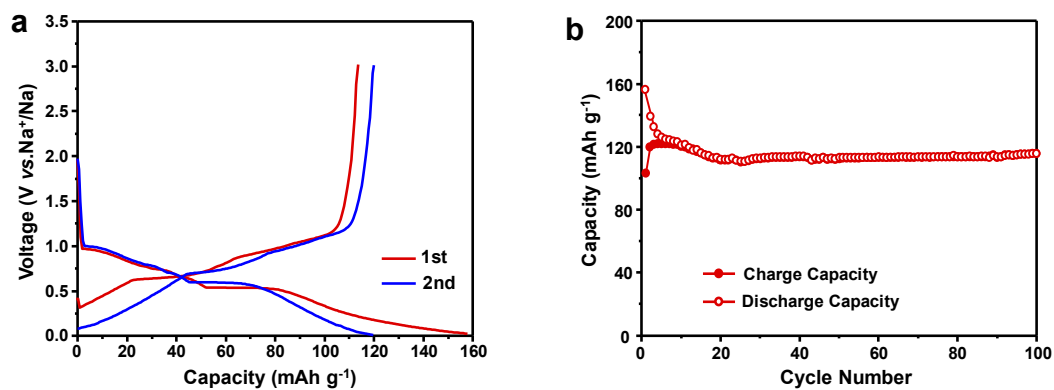

**Fig. S6** (a) Galvanostatic discharge/charge profiles and (b) cycle performance of the pure graphite anode at 100 mA g<sup>-1</sup> for SIBs.

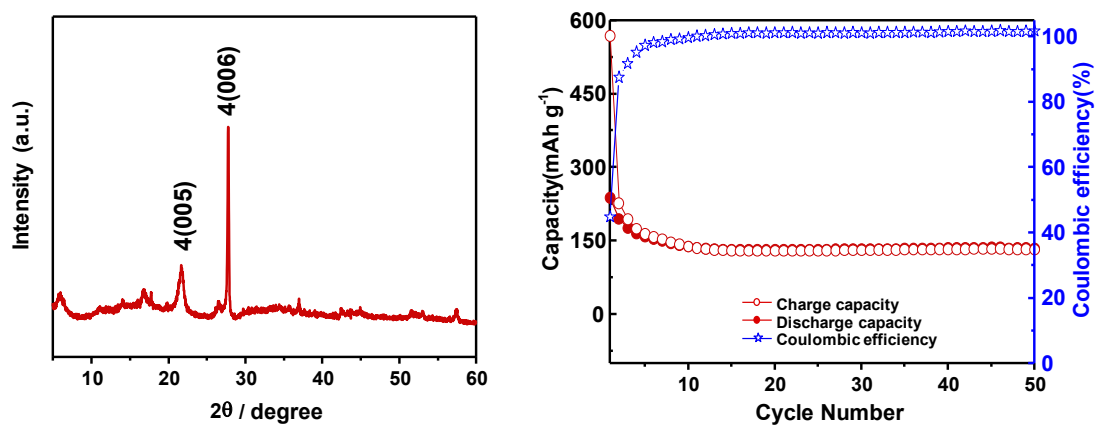

**Fig. S7** XRD pattern of the MoCl<sub>5</sub>-GIC-4 and cycle performance at 100 mA g<sup>-1</sup> for SIBs.

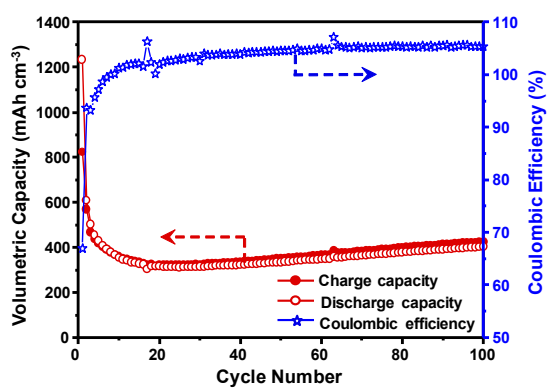

**Fig. S8** Cycle performance of MoCl<sub>5</sub>-GIC-1 with the volumetric capacities and the coulombic efficiencies for SIBs.



**Table S1.** Comparison of electrochemical data of MoCl<sub>5</sub>-GIC in this work with previously reported FeCl<sub>3</sub>-intercalated GIC anode materials for lithium-ion batteries.

| Sample                                                  | Type of battery | Capacity (mAh g <sup>-1</sup> ) at different current densities (A g <sup>-1</sup> ) |              |              | Cycle Number | Ref.             |
|---------------------------------------------------------|-----------------|-------------------------------------------------------------------------------------|--------------|--------------|--------------|------------------|
|                                                         |                 | 0.2                                                                                 | 1            | 5            |              |                  |
| <b>MoCl<sub>5</sub>-GIC</b>                             | <b>LIB</b>      | <b>0.2/1099</b>                                                                     | <b>1/600</b> | <b>2/512</b> | <b>150</b>   | <b>This work</b> |
|                                                         | <b>SIB</b>      | <b>0.1/275</b>                                                                      | <b>1/155</b> | <b>5/72</b>  | <b>1000</b>  |                  |
| FeCl <sub>3</sub> -GIC                                  | LIB             | 0.1/500                                                                             | 1/350        | 5/260        | 400          | [1]              |
| FeCl <sub>3</sub> -MGIC                                 | LIB             | 0.2/847                                                                             | 0.4/677      | 1.5/218      | 100          | [2]              |
| FeCl <sub>3</sub> -FLG                                  | LIB             | 0.2/810                                                                             | 1/500        | 2/415        | 50           | [3]              |
| C-Cl/FeCl <sub>2</sub> /C-Cl                            | LIB             | 0.2/615                                                                             | 1/408        | 3/298        | 1000         | [4]              |
| FeCl <sub>3</sub> -HOGIC                                | LIB             | 0.2/1371                                                                            | 1/963        | 5/192        | 50           | [5]              |
| Fe <sub>2</sub> O <sub>3</sub> / FeCl <sub>3</sub> -GIC | LIB             | 0.2/845                                                                             | 1/563        | 2/260        | 300          | [6]              |
| NiCl <sub>2</sub> -GICs                                 | LIB             | 0.1/442                                                                             | —            | —            | 50           | [1]              |
| CoCl <sub>2</sub> -GICs                                 | LIB             | 0.1/423                                                                             | —            | —            | 50           | [1]              |

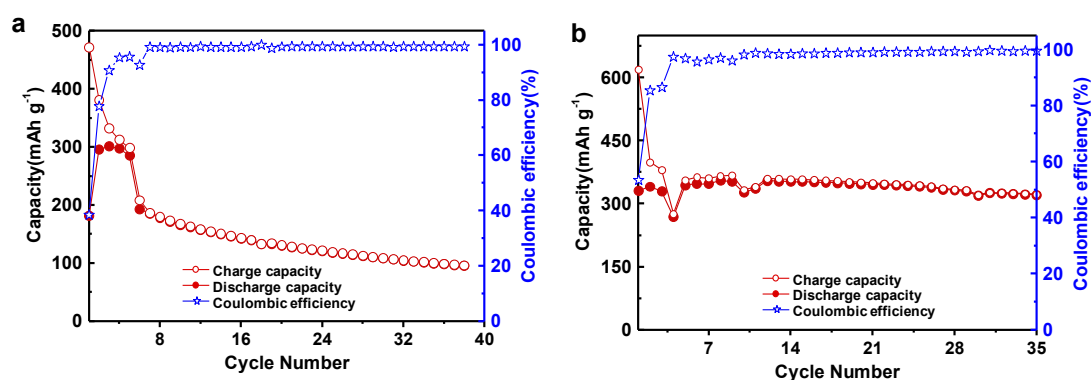

**Fig. S9** Cycle performance of the physically mixed MoCl<sub>5</sub> and graphite: (a) sodium storage at 100 mA g<sup>-1</sup>; (b) lithium storage at 200 mA g<sup>-1</sup>.

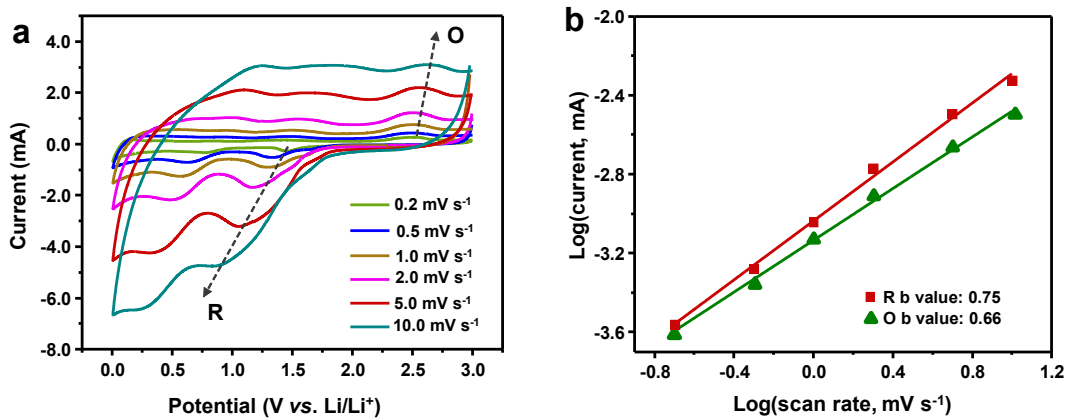

**Fig. S10** (a) CV curves at different scan rates, and (d) relationship between logarithm current vs. logarithm scan rate of  $\text{MoCl}_5\text{-GIC-1}$  for LIBs.

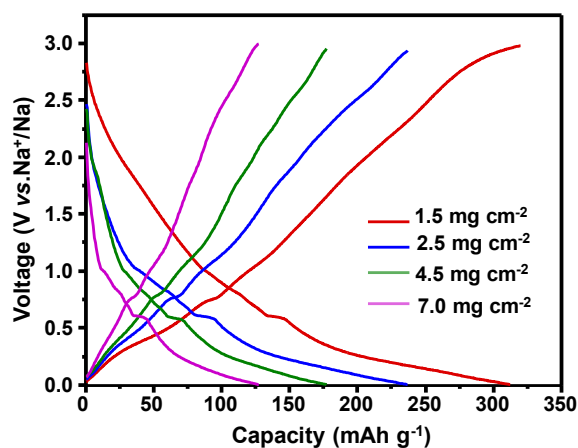

**Fig. S11** Galvanostatic discharge/charge voltage profiles of  $\text{MoCl}_5\text{-GIC-1}$  with different mass loadings for SIBs.

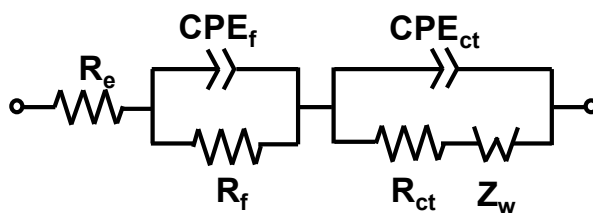

**Fig. S12** Equivalent electrical circuit for fitting electrochemical impedance data.

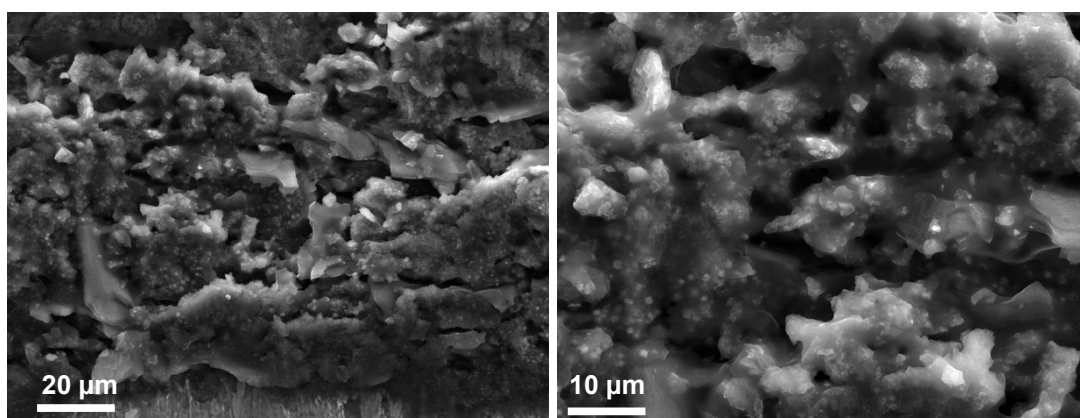

**Fig. S13** SEM images of the MoCl<sub>5</sub>-GIC-1 anodes after 100 fully sodiation/desodiation cycles.

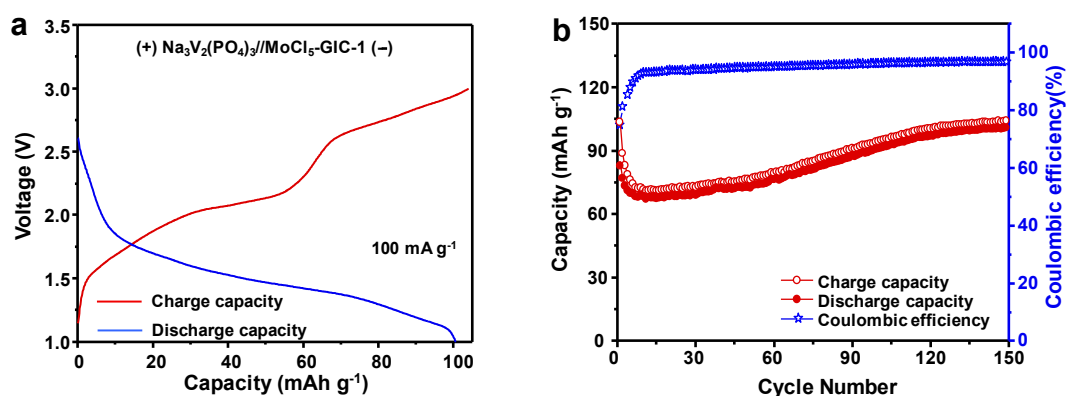

**Fig. S14** (a) Representative galvanostatic charge/discharge profile and (b) cycle performance of a full cell assembled with a Na<sub>3</sub>V<sub>2</sub>(PO<sub>4</sub>)<sub>3</sub> cathode and MoCl<sub>5</sub>-GIC-1 anode at 100 mA g<sup>-1</sup>.

## References

1. F. Wang, J. Yi, Y. Wang, C. Wang, J. Wang and Y. Xia, *Adv. Energy Mater.*, 2014, **4**, 1300600.
2. X. Qi, J. Qu, H.-B. Zhang, D. Yang, Y. Yu, C. Chi and Z.-Z. Yu, *J. Mater. Chem.*

*A*, 2015, **3**, 15498-15504.

3. L. Wang, C. Guo, Y. Zhu, J. Zhou, L. Fan and Y. Qian, *Nanoscale*, 2014, **6**, 14174-14179.

4. Y. Sn, F. Han, C. Zhang, F. Zhang, D. Zhou, H. Liu, C. Fan, X. Li and J. Liu *Energy Tech.*, 2019, **7**, 1801091.

5. C. Zhang, F. Han, J. Ma, Z. Li, F. Zhang, S. Xu, H. Liu, X. Li, J. Liu and A.-H. Lu, *J. Mater. Chem. A*, 2019, **7**, 11771-11781.

6. Z. Li, C. Zhang, F. Han, F. Zhang, D. Zhou, S. Xu, H. Liu, X. Li and J. Liu, *Nano Res.*, 2019, **12**, 1836-1844.
